# Supplementary material for: Bacillus amyloliquefaciens SC06 alleviates the obesity of ob/ob mice and improves their intestinal microbiota and bile acid metabolism
Source: Royal Society of Chemistry journal article supplement (doi:10.1039/d1fo03170h), 2022-01-01
Supplement: d1fo03170h1.pdf [file d1fo03170h1.pdf]

## Appendix A. Supplementary data

Table S1 Gene names and primer sequence

| Gene symbol | Gene name                                     | Primer sequence ((5'to3'))                                |
|-------------|-----------------------------------------------|-----------------------------------------------------------|
| GAPDH       | Glyceraldehyde-3-phosphate dehydrogenase      | F: GTTGTCTCCTGCGACTTCA<br>R: GCCCCTCCTGTTATTATGG          |
| FGFR4       | Fibroblast growth factor receptor 4           | F: ATGACCGTCGTACACAATCTTAC<br>R: TGCCAGTAGGGTGCTTGC       |
| ASBT        | Apical sodium-dependent bile acid transporter | F: GGAAGTGGCTCCAATATCCTG<br>R: GTTCCCGAGTCAACCCACAT       |
| IBABP       | Ileal bile acid-binding protein               | F: CCTTCAGTGGCAAATATG<br>R: GACCTCTGTGATGATCTT            |
| Oatp1a1     | Organic anion transporting polypeptide-1a1    | F: ATCCAGTGTGTGGGGACAAT<br>R: GCAGCTGCAATTTTGAAACA        |
| Oatp1b2     | Organic anion transporting polypeptide-1b2    | F: CAAACTCAGCATCCAAGCAA<br>R: GGCTGCCAAAATATCCTGA         |
| FXR         | Farnesoid X receptor                          | F: TCCAGGGTTTCAGACACTGG<br>R: GCCGAACGAAGAAACATGG         |
| FGF15       | Fibroblast growth factor 15                   | F: ACGTCCTTGATGGCAATCG<br>R: GAGGACCAAACGAACGAAATT        |
| CYP7A1      | Cholesterol 7 $\alpha$ -hydroxylase           | F: AGCAACTAAACAACCTGCCAGTACTA<br>R: GTCCGGATATTCAAGGATGCA |
| CYP27A1     | Sterol 27-hydroxylase                         | F: GCCTCACCTATGGGATCTTCA<br>R: TCAAAGCCTGACGCAGATG        |
| SHP         | Short heterodimer partner                     | F: CGATCCTCTTCAACCCAGATG<br>R: AGGGCTCCAAGACTTCACACA      |
| CYP7B1      | Oxysterol 7 $\alpha$ -hydroxylase             | F: TAGCCCTCTTTCCTCCACTCATA<br>R: GAACCGATCGAACCTAAATTCCT  |

|              |                                             |                                                     |
|--------------|---------------------------------------------|-----------------------------------------------------|
| CYP8B1       | Sterol 12 $\alpha$ -hydroxylase             | F: AGTACACATGGACCCCGACATC<br>R: GGGTGCCATCCGGGTTGAG |
| BSEP         | Bile salt export pump(Abcb11)               | F: CTGCCAAGGATGCTAATGCA<br>R: CGATGGCTACCCTTTGCTTCT |
| NTCP         | Na <sup>+</sup> /taurocholate cotransporter | F: ATGACCACCTGCTCCAGCTT<br>R: GCCTTTGTAGGGCACCTTGT  |
| OST $\alpha$ | Organic solute transporter $\alpha$         | F: GATGCGGCTCCTTGGAATTA<br>R:GGAGGAACATGCTTGTCATGAC |
| OST $\beta$  | Organic solute transporter $\beta$          | F: AGATGCGGCTCCTTGGAATTA<br>R: TGGCAGAAAGACAAGTGATG |

---
